# Supplementary material for: 4 in 1: multifunctional europium–organic frameworks with luminescence sensing properties, white light emission, proton conductivity and reverse acetylene–carbon dioxide adsorption selectivity
Source: Royal Society of Chemistry journal article supplement (doi:10.1039/d3dt01323e), 2023-01-01
Supplement: d3dt01323e1.pdf [file d3dt01323e1.pdf]

## SUPPLEMENTARY MATERIALS

### **4 in 1: multifunctional europium-organic framework with luminescent sensing properties, white light emission, proton conductivity and reverse acetylene-carbon dioxide adsorption selectivity**

Xiaolin Yu <sup>a,b</sup>, Alexey A. Ryadun <sup>b</sup>, Konstantin A. Kovalenko <sup>b</sup>, Tatiana Y. Guselnikova <sup>b</sup>,  
Valentina G. Ponomareva <sup>c</sup>, Andrei S. Potapov <sup>a,b</sup>, Vladimir P. Fedin <sup>a,b\*</sup>

<sup>a</sup> *Novosibirsk State University, 2 Pirogov Str. 630090, Novosibirsk, Russia*

<sup>b</sup> *Nikolaev Institute of Inorganic Chemistry, Siberian Branch of the Russian Academy of Sciences, 3 Lavrentiev Ave., 630090, Novosibirsk, Russia*

<sup>c</sup> *Institute of Solid State Chemistry and Mechanochemistry, Siberian Branch of the Russian Academy of Sciences, 18 Kutateladze Str. 630090, Novosibirsk, Russia*

## 1. Supplementary figures

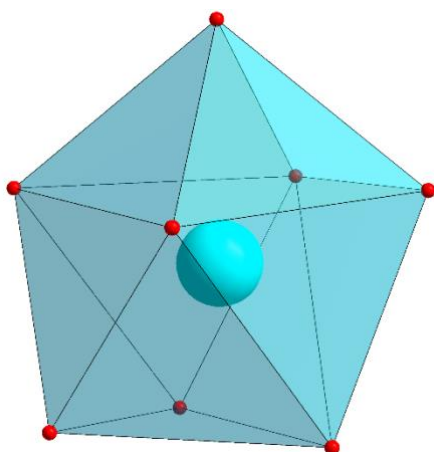

Figure S1. The coordination environment of  $\text{Eu}^{3+}$  ion.

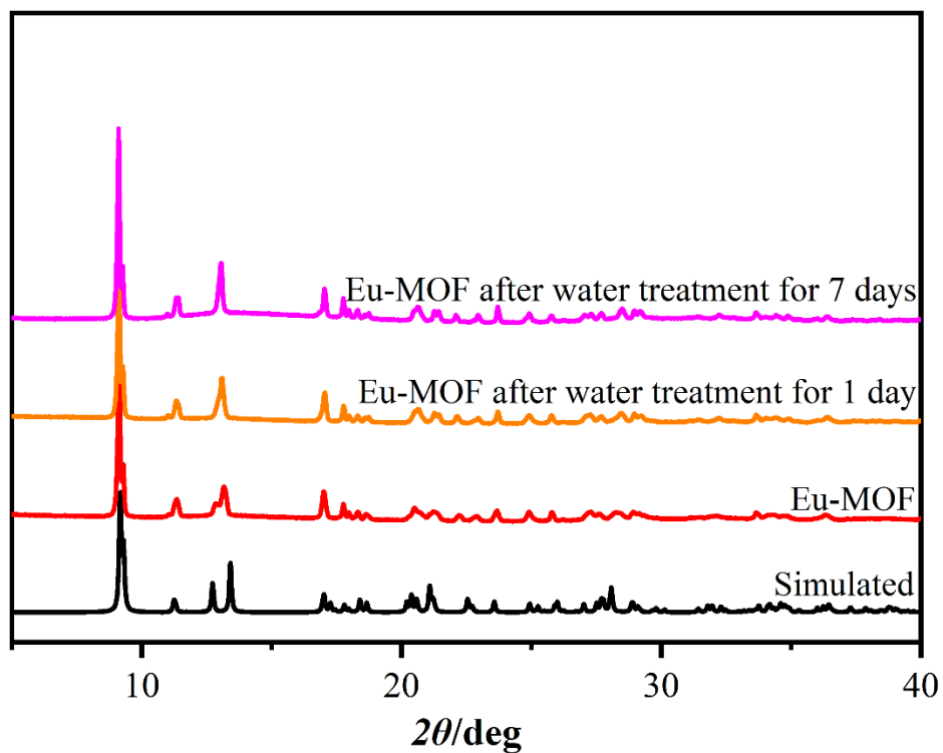

Figure S2. PXRD patterns of **Eu-MOF** bulk product (red) and Eu-MOF powder after immersion in water treatment for 1 day (orange) and 7 days (magenta) at 25 °C.

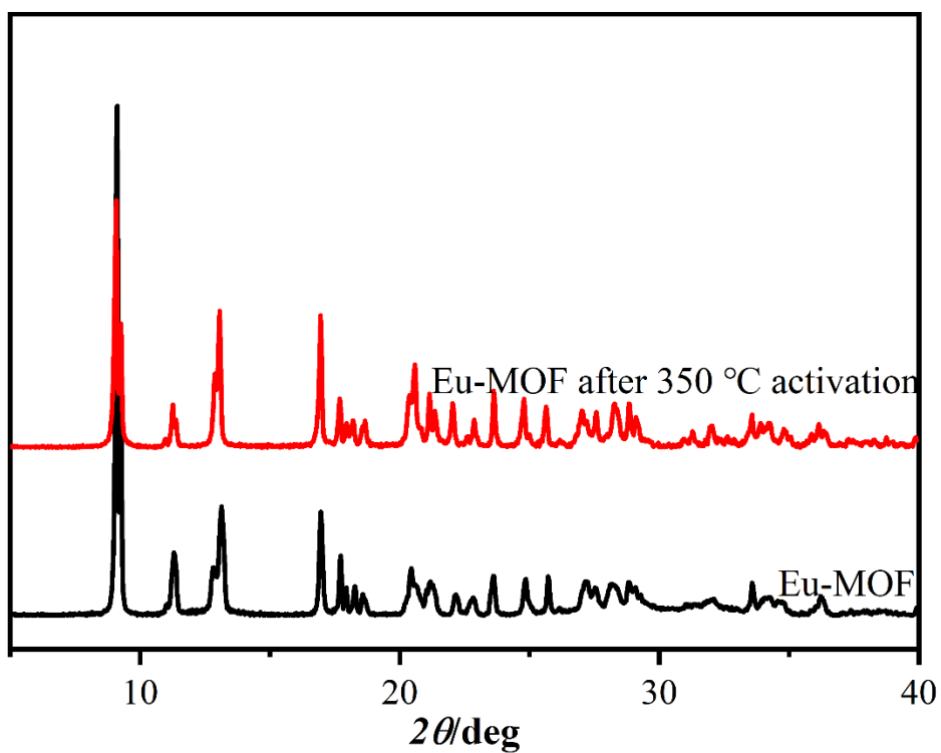

Figure S3. PXRD patterns of **Eu-MOF** after activation at 350 °C.

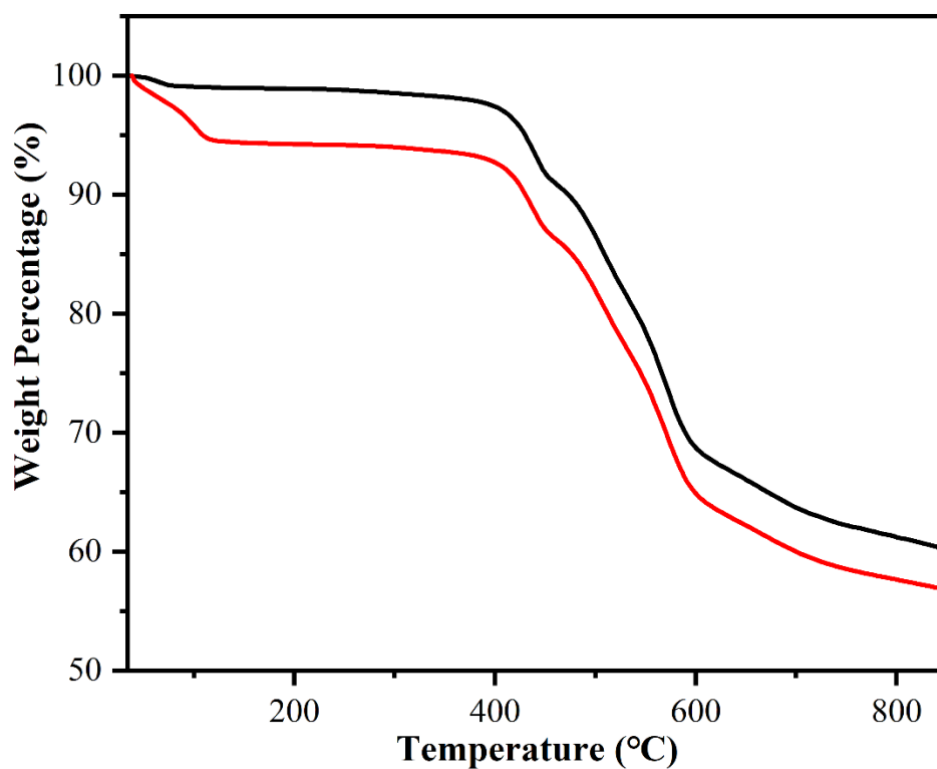

Figure S4. TGA plots of **Eu-MOF** under helium atmosphere after removal of coordinated and solvate water and acetonitrile molecules (black) and after standing in the air at room temperature for 10 days (red)

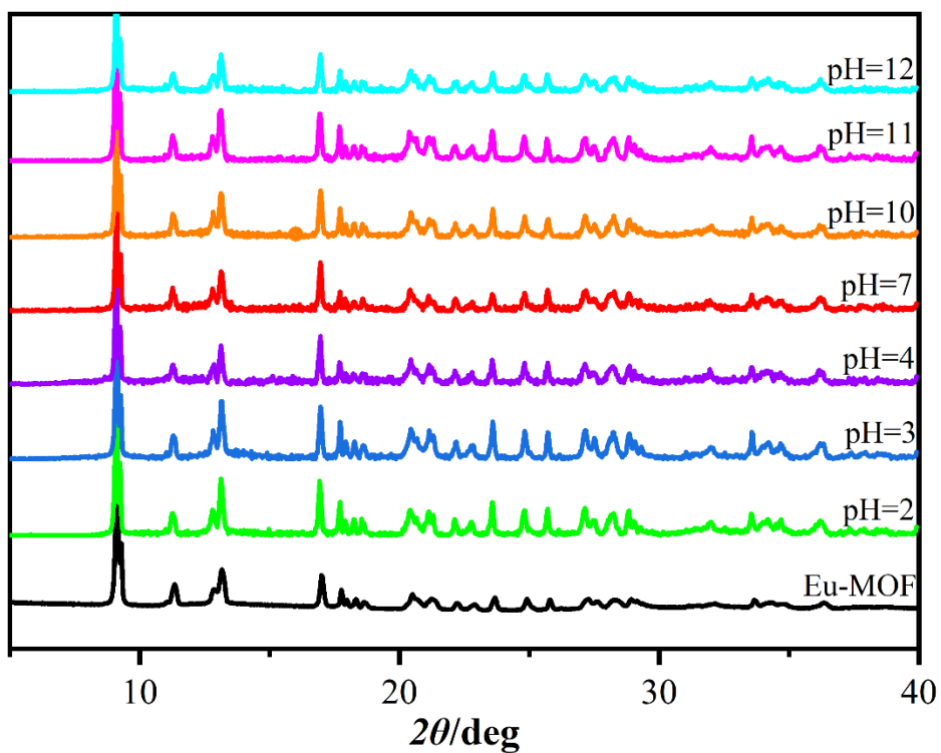

(a)

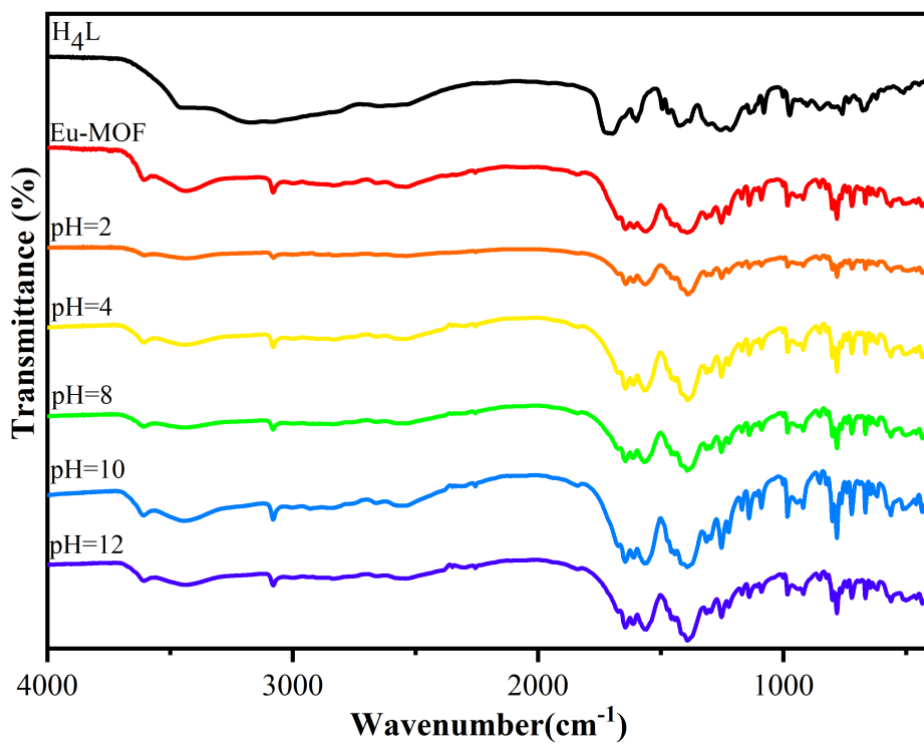

(b)

Figure S5. PXRD patterns (a) and FT-IR spectra (b) of **Eu-MOF** after soaking in aqueous solutions at different pH for 3 h at 25 °C.

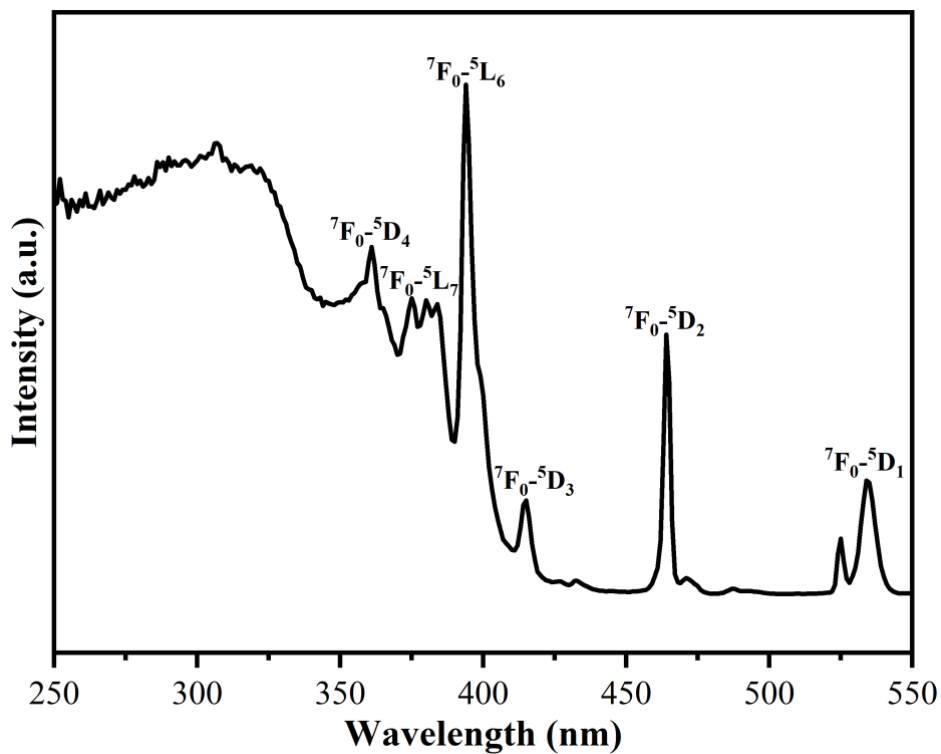

Figure S6. Solid state excitation spectrum of **Eu-MOF**.

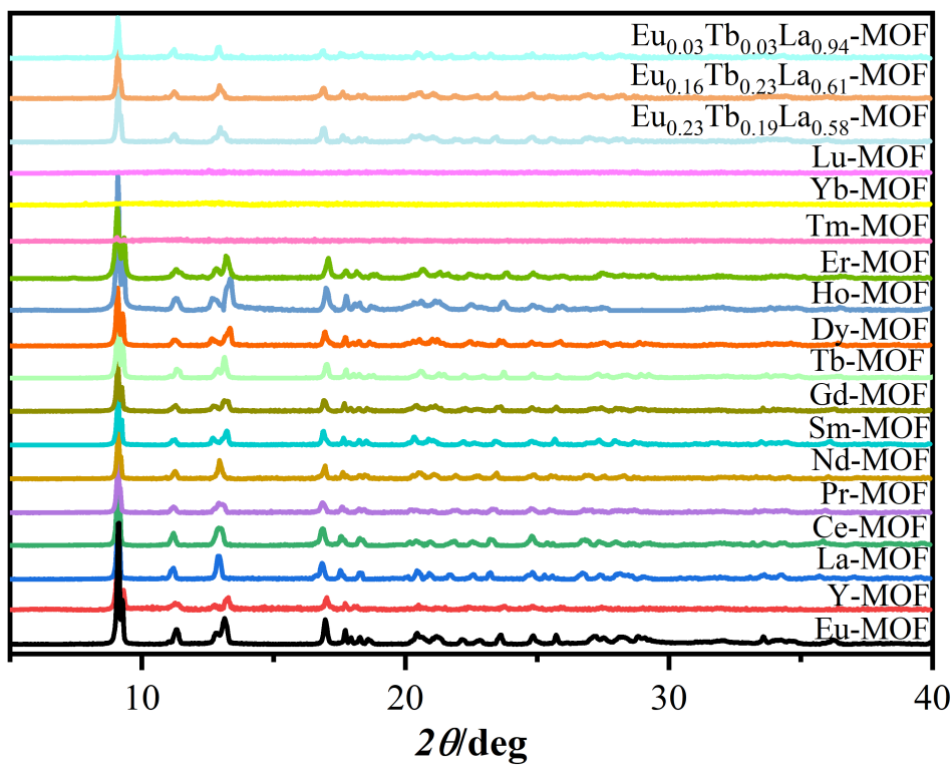

Figure S7. PXRD patterns of a series of lanthanide MOFs.

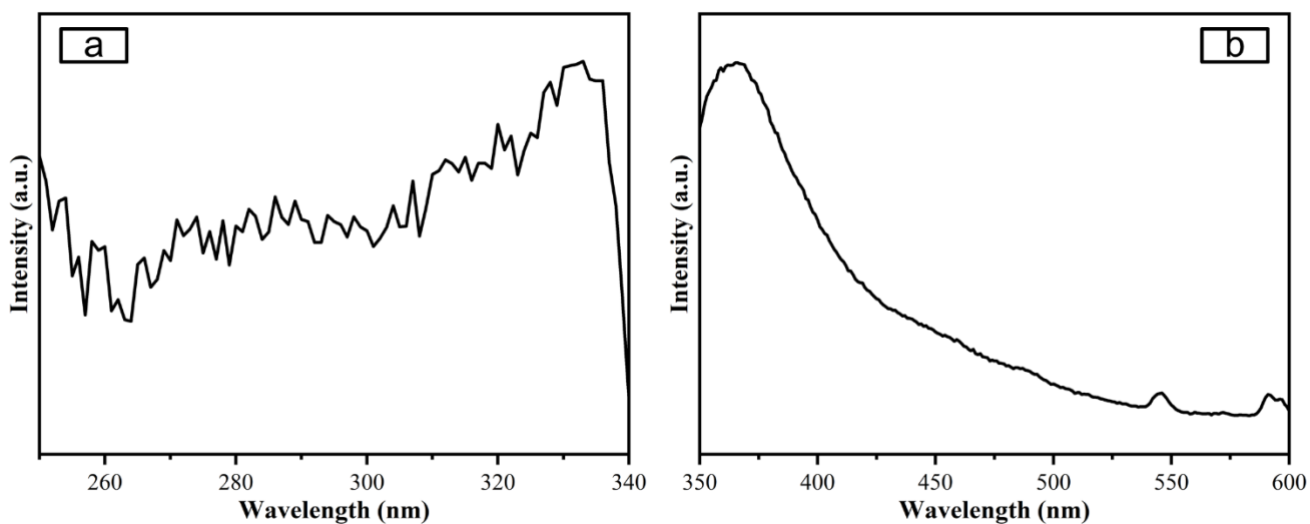

Figure S8. Solid state excitation (a) and emission (b,  $\lambda_{\text{ex}}$  330 nm) spectra of **La-MOF**.

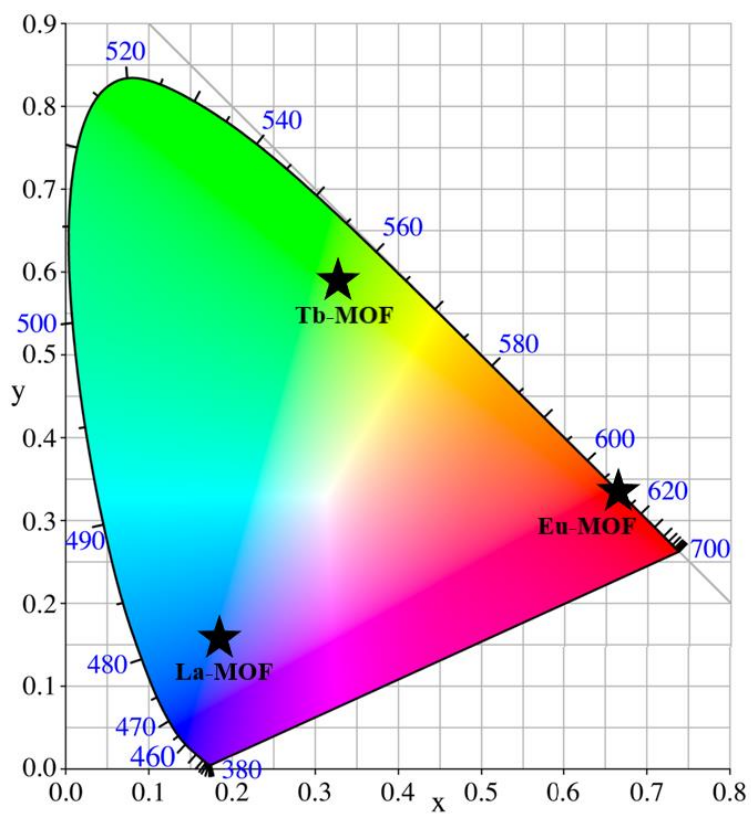

Figure S9. CIE-1931 chromaticity diagram for emission of **La-MOF** ( $\lambda_{\text{ex}}$ =330 nm), **Eu-MOF** ( $\lambda_{\text{ex}}$ =320 nm) and **Tb-MOF** ( $\lambda_{\text{ex}}$ =320 nm).

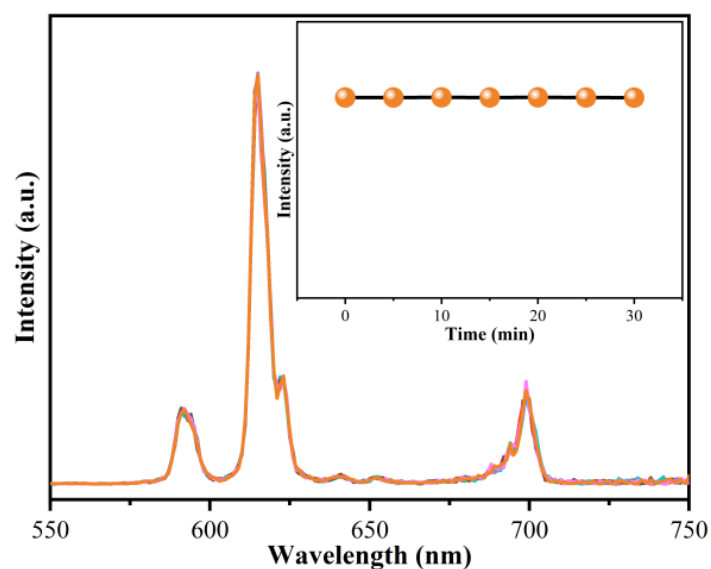

Figure S10. Emission spectra of aqueous suspension of **Eu-MOF** ( $\lambda_{\text{ex}}=320$  nm) recorded at 5 minutes intervals. Inset shows the independence of 625 nm peak intensity from time.

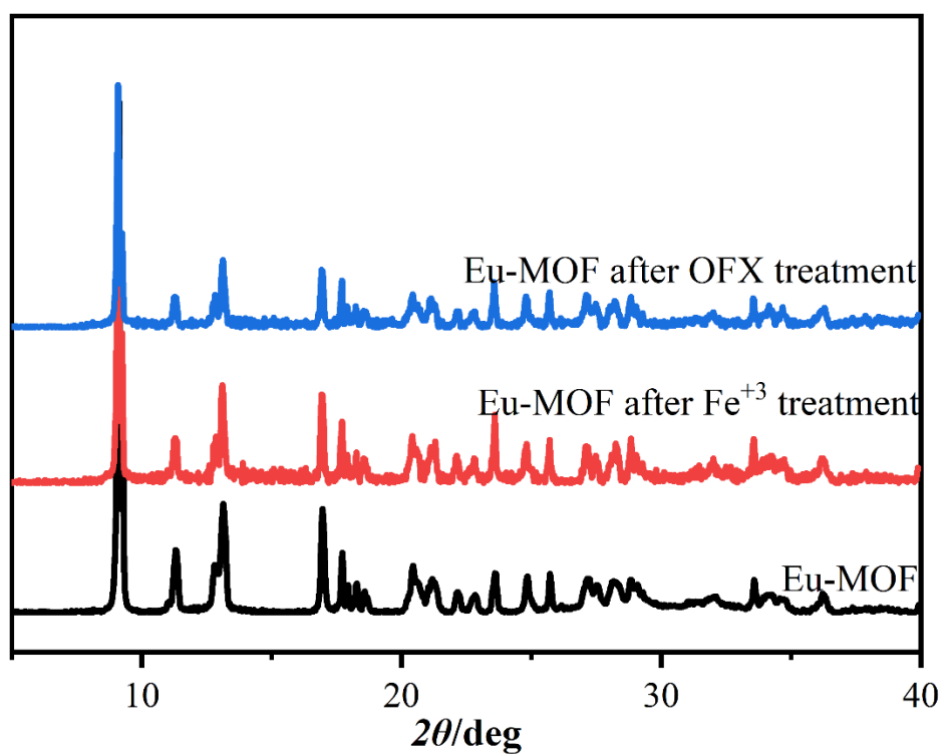

Figure S11. PXRD patterns of Eu-MOF after  $\text{Fe}^{3+}$  ( $C = 10^{-4}$  M) treatment for 3 hours.

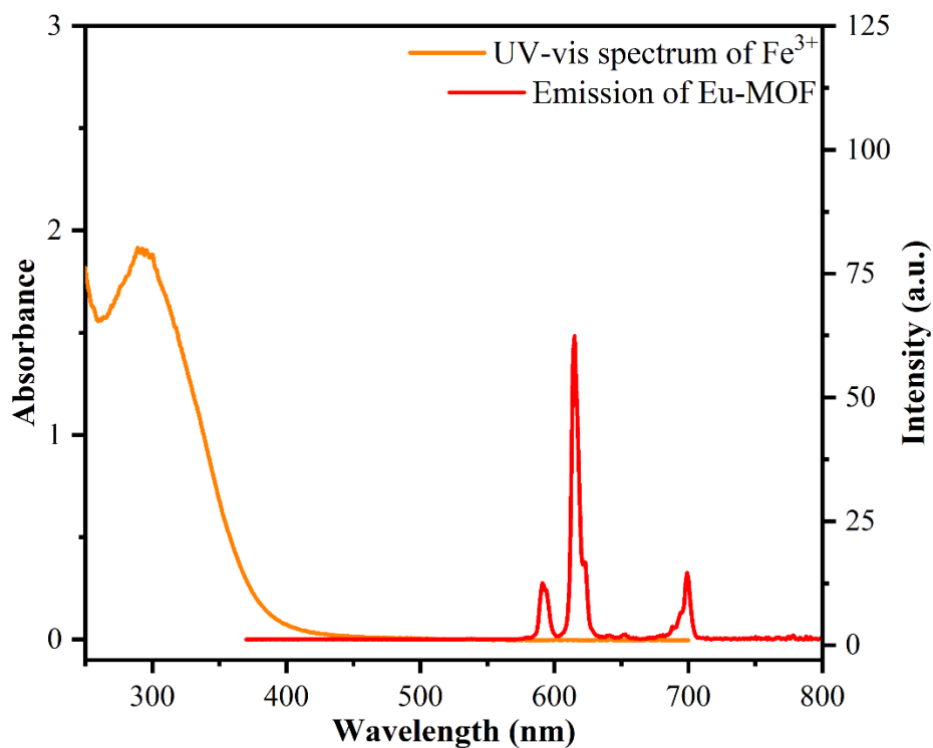

Figure S12. The UV-vis spectrum of  $\text{Fe}^{3+}$  ( $C = 10^{-4} \text{ M}$ ) and emission spectra of **Eu-MOF** in water suspension

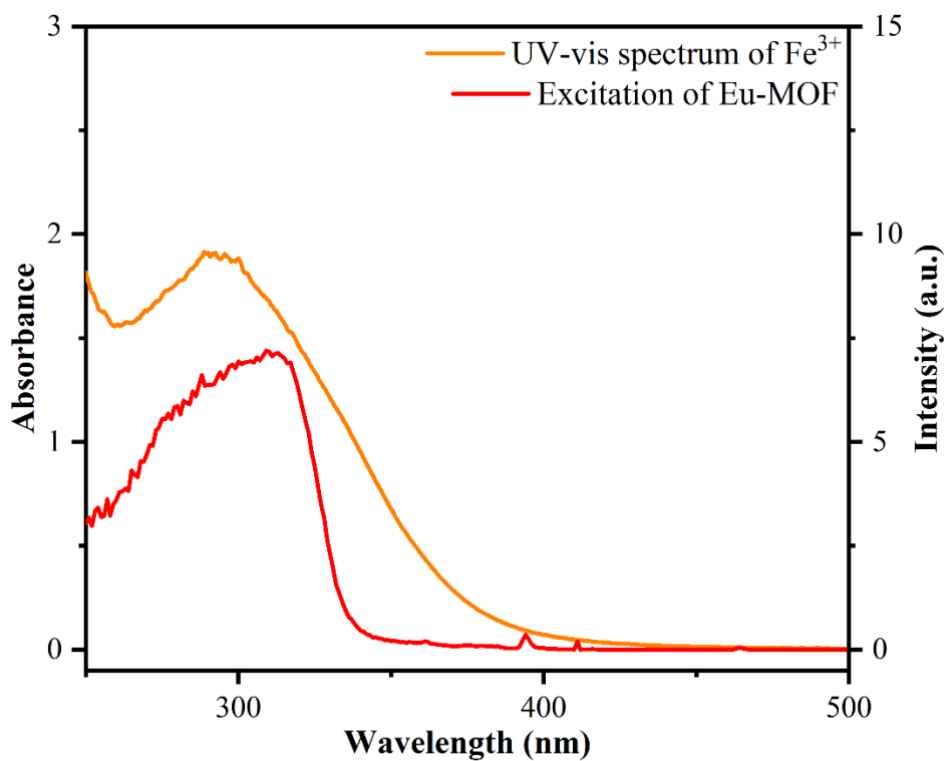

Figure S13. The UV-vis spectrum of  $\text{Fe}^{3+}$  ( $C = 10^{-4} \text{ M}$ ) and excitation spectra of **Eu-MOF** in water suspension.



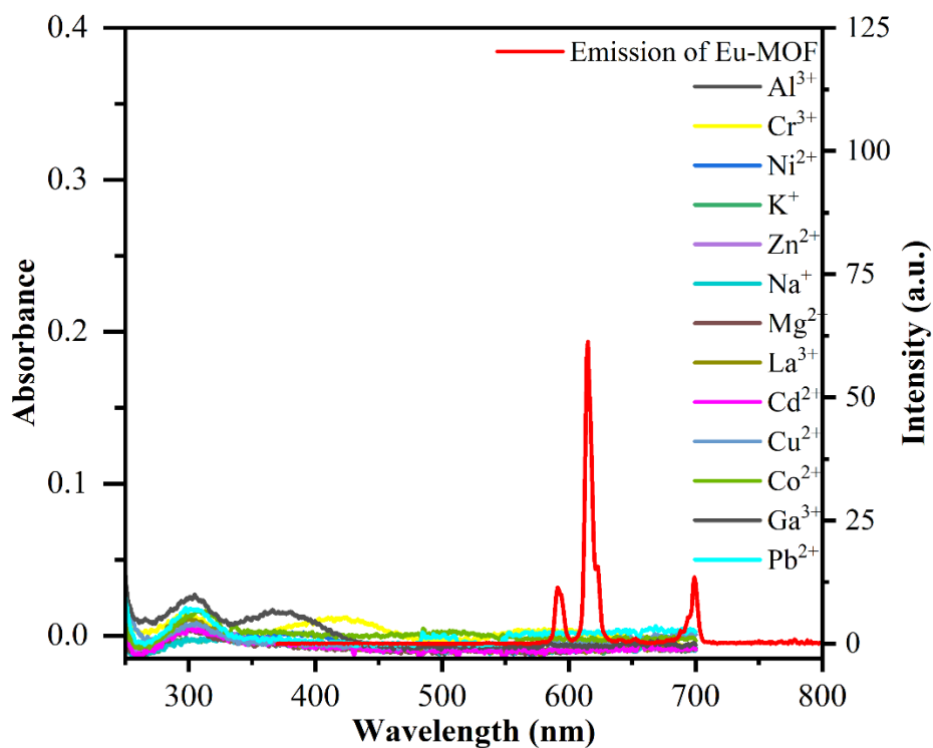

Figure S14. The UV-vis spectrum of the interfering ions ( $C = 10^{-4}$  M) and emission spectra of Eu-MOF in water suspension.

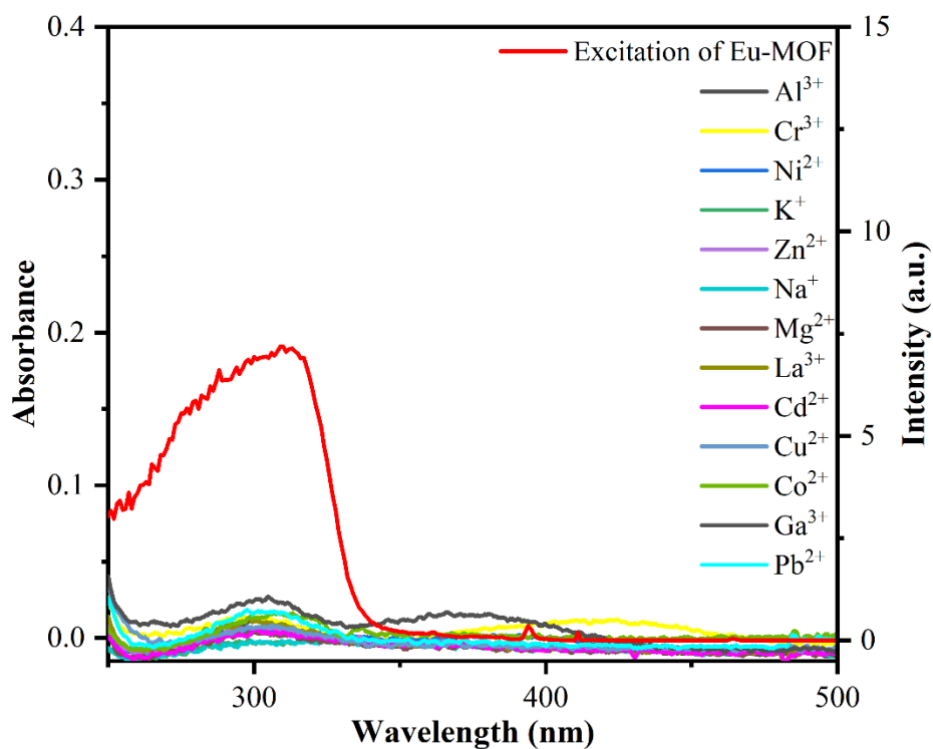

Figure S15. The UV-vis spectrum of the interfering ions ( $C = 10^{-4}$  M) and excitation spectra of Eu-MOF in water suspension.

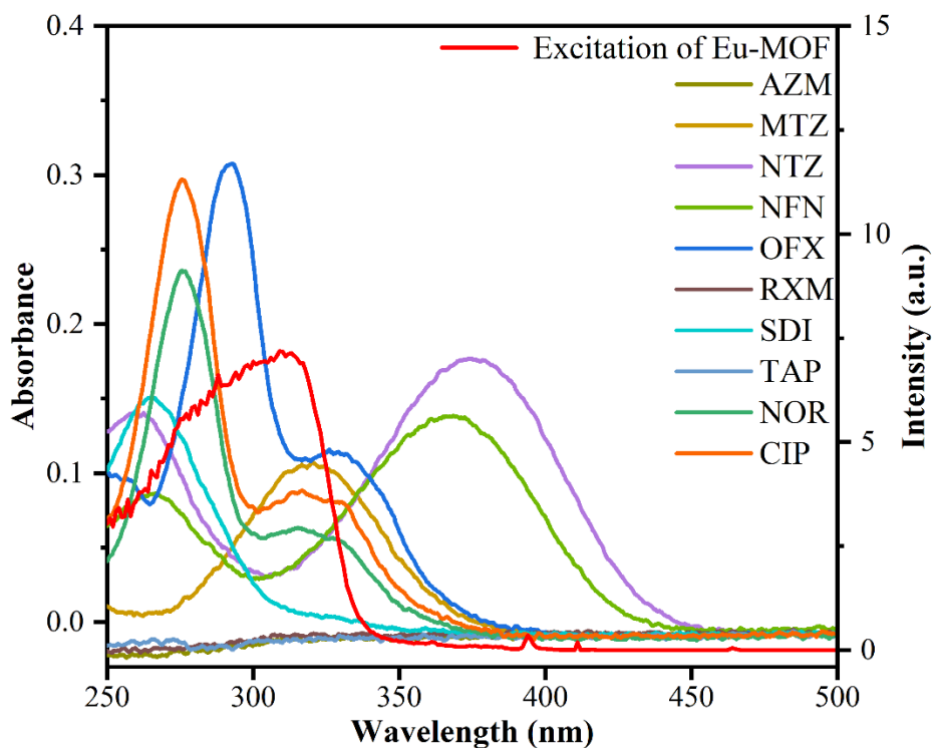

Figure S16. The UV-vis spectra of antibiotics ( $C = 10^{-5} \text{ M}$ ) and the excitation spectrum of **Eu-MOF**.

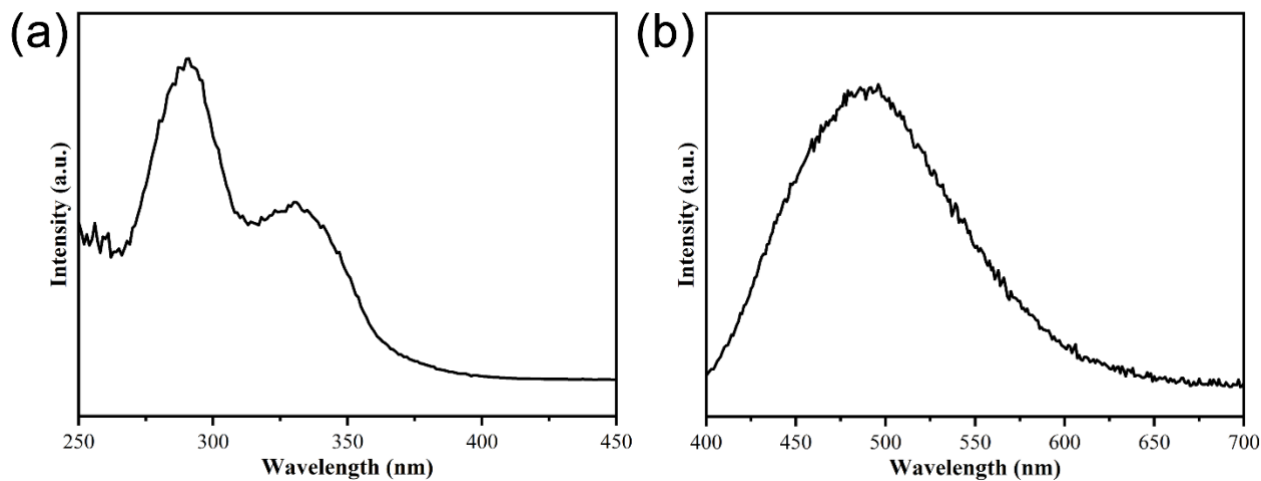

Figure S17. Excitation spectrum (a) and emission spectrum (b) of OFX solution ( $C_{\text{OFX}} = 10^{-5} \text{ M}$ ).

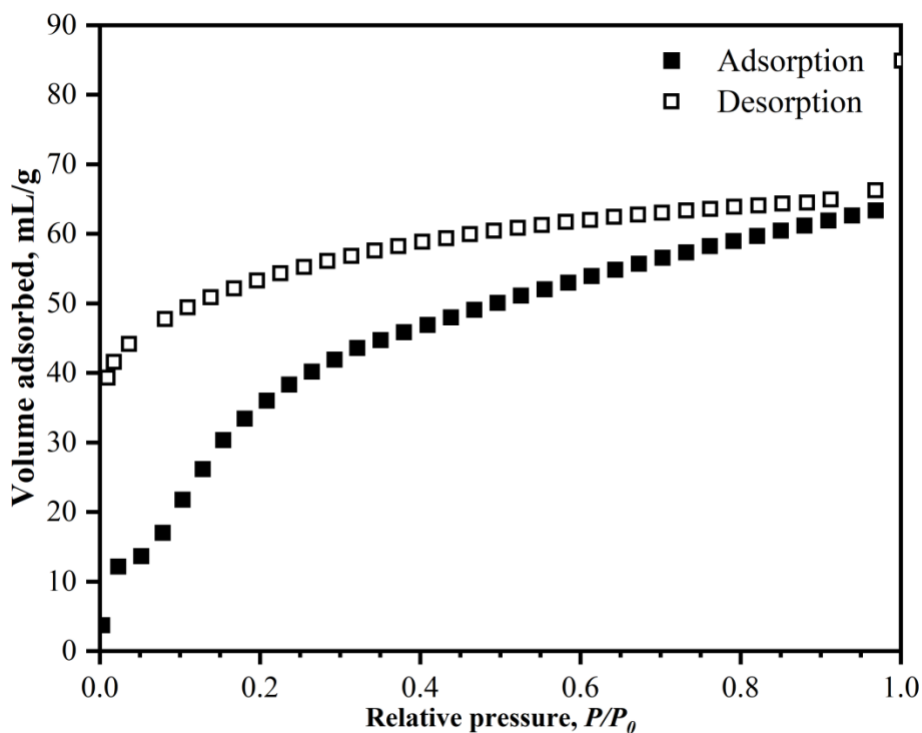

Figure S18. Carbon dioxide adsorption-desorption isotherms at 195 K.

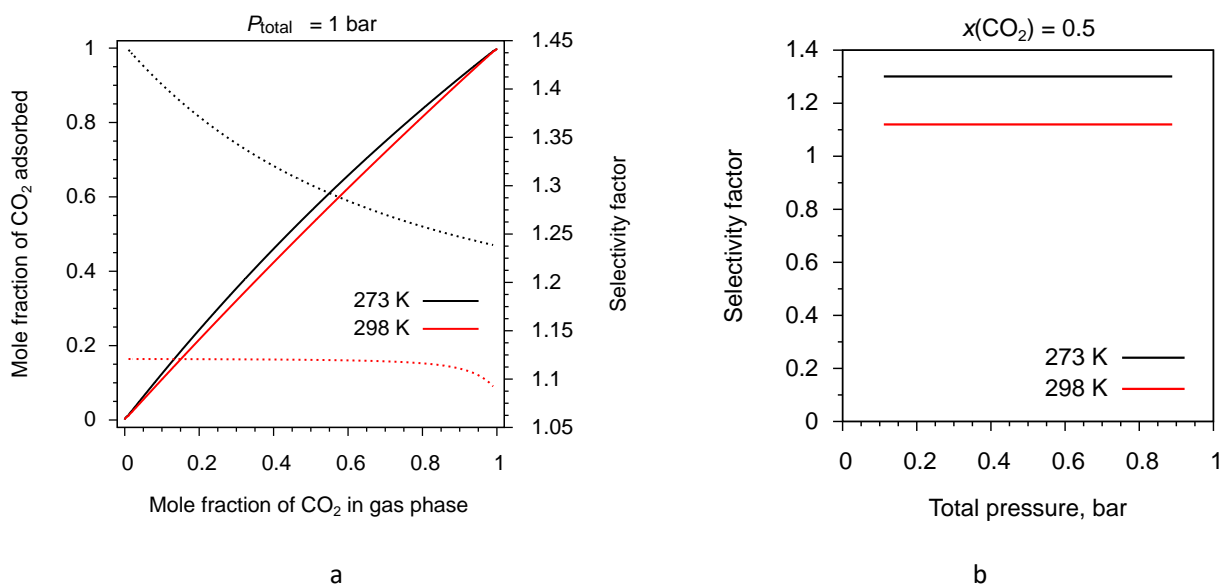

Figure S19. a) Prediction of adsorption equilibrium by IAST (solid lines) and dependence of selectivity factor on gas phase composition (dashed lines) at total pressure of  $\text{CO}_2/\text{C}_2\text{H}_2$  mixture of 1 bar; b) dependence of selectivity factor on total pressure of equimolar binary  $\text{CO}_2/\text{C}_2\text{H}_2$  mixture.

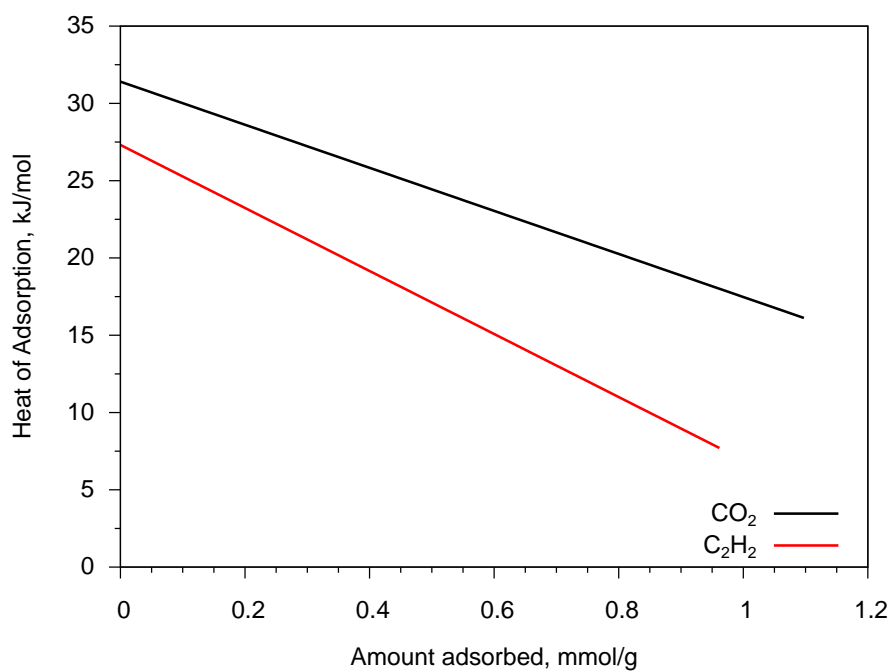

Figure S20. Isosteric heats of CO<sub>2</sub> and C<sub>2</sub>H<sub>2</sub> adsorption on **Eu-MOF**.

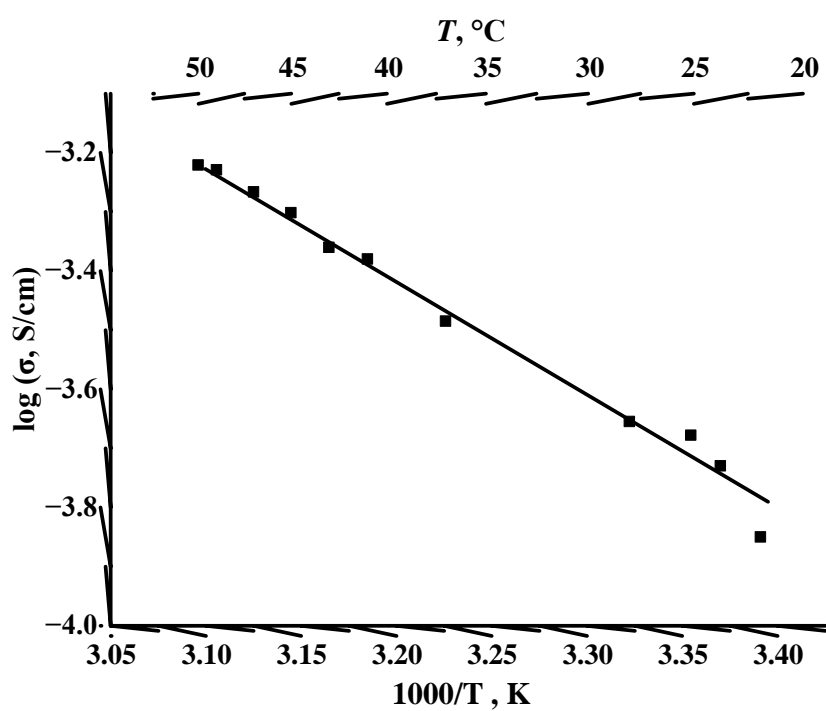

Figure S21. Temperature dependence of proton conductivity of **Eu-MOF** at RH = 100%.

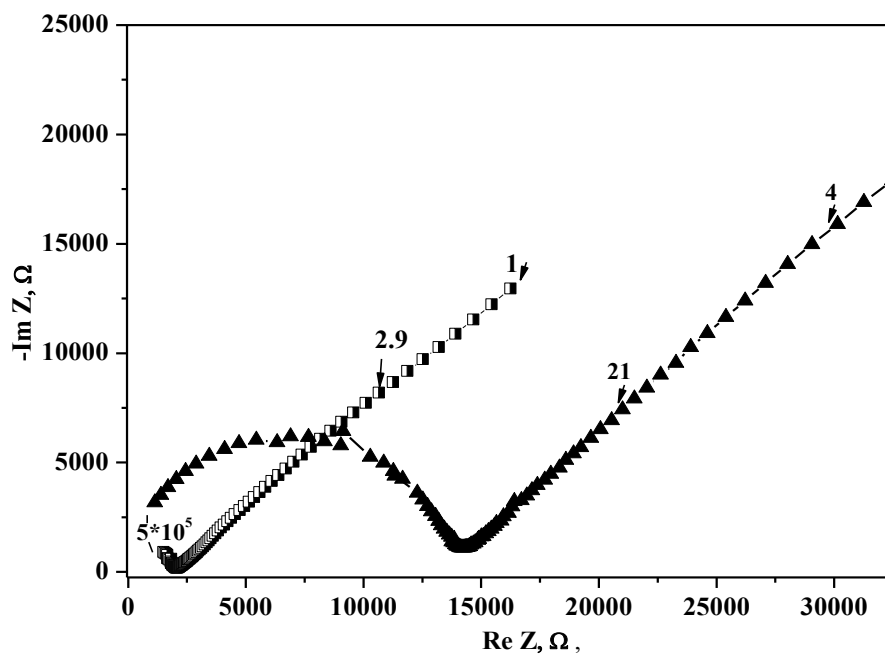

Figure S22. Impedance spectra of **Eu-MOF** at low (squares) and high (triangles) relative humidity. The values on graphs show the corresponding AC frequencies.

## 2. Supplementary tables

Table S1. Crystal data and structure refinements for **Eu-MOF**

| Compound                                       | <b>Eu-MOF</b>                                                         |
|------------------------------------------------|-----------------------------------------------------------------------|
| Molecular formula                              | C <sub>17</sub> H <sub>11</sub> EuN <sub>0.5</sub> O <sub>10.25</sub> |
| Formula weight, g·mol <sup>-1</sup>            | 538.22                                                                |
| Temperature, K                                 | 150(2)                                                                |
| Crystal system                                 | triclinic                                                             |
| Space group                                    | P-1                                                                   |
| <i>a</i> , Å                                   | 9.5701(9)                                                             |
| <i>b</i> , Å                                   | 10.5245(10)                                                           |
| <i>c</i> , Å                                   | 10.6495(8)                                                            |
| $\alpha$ , °                                   | 81.949(3)                                                             |
| $\beta$ , °                                    | 64.876(3)                                                             |
| $\gamma$ , °                                   | 65.100(3)                                                             |
| Cell volume, Å <sup>3</sup>                    | 879.89(14)                                                            |
| <i>Z</i>                                       | 2                                                                     |
| $\rho_{\text{calc}}$ , g/cm <sup>3</sup>       | 2.031                                                                 |
| $\mu$ , mm <sup>-1</sup>                       | 3.624                                                                 |
| F(000)                                         | 523.0                                                                 |
| Independent reflections                        | 3297 [ $R_{\text{int}} = 0.1097$ , $R_{\text{sigma}} = 0.1195$ ]      |
| Goodness-of-fit on F <sup>2</sup>              | 0.983                                                                 |
| Final <i>R</i> indexes [ $I \geq 2\sigma(I)$ ] | $R_1 = 0.0558$ , $wR_2 = 0.1215$                                      |
| Final <i>R</i> indexes [all data]              | $R_1 = 0.0832$ , $wR_2 = 0.1330$                                      |

Table S2. Selected bond lengths (Å) and angles (°) for **Eu-MOF**

|                                           |             |                                           |             |
|-------------------------------------------|-------------|-------------------------------------------|-------------|
| Eu1—O1M                                   | 2.548 (6)   | Eu1—O16 <sup>iii</sup>                    | 2.366 (7)   |
| Eu1—O11                                   | 2.315 (6)   | Eu1—O17 <sup>iv</sup>                     | 2.434 (6)   |
| Eu1—O12 <sup>i</sup>                      | 2.360 (7)   | Eu1—O18 <sup>v</sup>                      | 2.373 (6)   |
| Eu1—O13 <sup>ii</sup>                     | 2.575 (7)   | Eu1—O19 <sup>vi</sup>                     | 2.360 (7)   |
| O1M—Eu1—Eu1 <sup>i</sup>                  | 109.15 (16) | O12 <sup>i</sup> —Eu1—O18 <sup>v</sup>    | 140.3 (2)   |
| O1M—Eu1—O13 <sup>ii</sup>                 | 127.3 (2)   | O12 <sup>i</sup> —Eu1—O19 <sup>vi</sup>   | 84.5 (2)    |
| O1M—Eu1—C9 <sup>iv</sup>                  | 135.9 (2)   | O12 <sup>i</sup> —Eu1—C9 <sup>iv</sup>    | 75.8 (2)    |
| O11—Eu1—Eu1 <sup>i</sup>                  | 61.56 (17)  | O13 <sup>ii</sup> —Eu1—Eu1 <sup>i</sup>   | 123.51 (17) |
| O11—Eu1—O1M                               | 69.6 (2)    | O13 <sup>ii</sup> —Eu1—C9 <sup>iv</sup>   | 83.1 (2)    |
| O11—Eu1—O12 <sup>i</sup>                  | 125.1 (2)   | O16 <sup>iii</sup> —Eu1—Eu1 <sup>i</sup>  | 46.39 (17)  |
| O11—Eu1—O13 <sup>ii</sup>                 | 137.7 (2)   | O16 <sup>iii</sup> —Eu1—O1M               | 75.0 (2)    |
| O11—Eu1—O16 <sup>iii</sup>                | 75.7 (2)    | O16 <sup>iii</sup> —Eu1—O13 <sup>ii</sup> | 141.7 (2)   |
| O11—Eu1—O17 <sup>iv</sup>                 | 72.6 (2)    | O16 <sup>iii</sup> —Eu1—O17 <sup>iv</sup> | 121.4 (2)   |
| O11—Eu1—O18 <sup>v</sup>                  | 83.5 (2)    | O16 <sup>iii</sup> —Eu1—O18 <sup>v</sup>  | 145.6 (2)   |
| O11—Eu1—O19 <sup>vi</sup>                 | 141.4 (2)   | O17 <sup>iv</sup> —Eu1—Eu1 <sup>i</sup>   | 75.17 (17)  |
| O11—Eu1—C9 <sup>iv</sup>                  | 67.0 (2)    | O17 <sup>iv</sup> —Eu1—O1M                | 132.8 (2)   |
| O12 <sup>i</sup> —Eu1—Eu1 <sup>i</sup>    | 64.20 (17)  | O17 <sup>iv</sup> —Eu1—O13 <sup>ii</sup>  | 69.6 (2)    |
| O12 <sup>i</sup> —Eu1—O1M                 | 139.3 (2)   | O17 <sup>iv</sup> —Eu1—C9 <sup>iv</sup>   | 20.5 (2)    |
| O12 <sup>i</sup> —Eu1—O13 <sup>ii</sup>   | 70.7 (2)    | O18 <sup>v</sup> —Eu1—Eu1 <sup>i</sup>    | 140.08 (17) |
| O12 <sup>i</sup> —Eu1—O16 <sup>iii</sup>  | 73.6 (2)    | O18 <sup>v</sup> —Eu1—O1M                 | 72.1 (2)    |
| O12 <sup>i</sup> —Eu1—O17 <sup>iv</sup>   | 86.2 (2)    | O18 <sup>v</sup> —Eu1—O13 <sup>ii</sup>   | 69.8 (2)    |
| O18 <sup>v</sup> —Eu1—O17 <sup>iv</sup>   | 76.4 (2)    | C9 <sup>iv</sup> —Eu1—Eu1 <sup>i</sup>    | 54.81 (19)  |
| O18 <sup>v</sup> —Eu1—C9 <sup>iv</sup>    | 95.4 (2)    | C1—O11—Eu1                                | 147.1 (7)   |
| O19 <sup>vi</sup> —Eu1—Eu1 <sup>i</sup>   | 132.73 (16) | C1—O12—Eu1 <sup>i</sup>                   | 137.2 (6)   |
| O19 <sup>vi</sup> —Eu1—O1M                | 71.8 (2)    | C8—O13—Eu1 <sup>vii</sup>                 | 134.9 (7)   |
| O19 <sup>vi</sup> —Eu1—O13 <sup>ii</sup>  | 70.8 (2)    | C5—O15—C15                                | 113.5 (8)   |
| O19 <sup>vi</sup> —Eu1—O16 <sup>iii</sup> | 92.7 (2)    | C9—O16—Eu1 <sup>iii</sup>                 | 175.8 (7)   |
| O19 <sup>vi</sup> —Eu1—O17 <sup>iv</sup>  | 140.1 (2)   | C9—O17—Eu1 <sup>viii</sup>                | 116.6 (6)   |
| O19 <sup>vi</sup> —Eu1—O18 <sup>v</sup>   | 86.5 (2)    | C10—O18—Eu1 <sup>v</sup>                  | 142.9 (6)   |
| O19 <sup>vi</sup> —Eu1—C9 <sup>iv</sup>   | 151.4 (2)   | C10—O19—Eu1 <sup>ix</sup>                 | 143.8 (6)   |

Symmetry codes: (i)  $-x+1, -y, -z$ ; (ii)  $x+1, y, z-1$ ; (iii)  $-x+1, -y, -z+1$ ; (iv)  $x, y, z-1$ ; (v)  $-x+1, -y+1, -z+1$ ; (vi)  $x+1, y-1, z-1$ ; (vii)  $x-1, y, z+1$ ; (viii)  $x, y, z+1$ ; (ix)  $x-1, y+1, z+1$ .

Table S3. ICP-AES analysis results of trimetallic MOFs

| Compound                                                      | Eu content, mol. % | Tb content, mol. % | La content, mol. % |
|---------------------------------------------------------------|--------------------|--------------------|--------------------|
| Eu <sub>0.23</sub> Tb <sub>0.19</sub> La <sub>0.58</sub> -MOF | 23.0               | 19.5               | 57.5               |
| Eu <sub>0.16</sub> Tb <sub>0.23</sub> La <sub>0.61</sub> -MOF | 16.0               | 22.7               | 61.3               |
| Eu <sub>0.03</sub> Tb <sub>0.03</sub> La <sub>0.94</sub> -MOF | 3.3                | 2.7                | 94.0               |

Table S4. CIE color coordinates, absolute quantum yields and luminescence lifetimes for

**Tb-MOF, La-MOF and trimetallic Eu<sub>x</sub>Tb<sub>y</sub>La<sub>1-x-y</sub> MOFs**

| compounds                                                     | CIE coordinates | $\psi$ (%) | $\tau$ (ms) | $\lambda_{ex}$ (nm) | $\lambda_{em}$ (nm) |
|---------------------------------------------------------------|-----------------|------------|-------------|---------------------|---------------------|
| Tb-MOF                                                        | (0.33, 0.59)    | 44         | 1.16        | 320                 | 545                 |
| La-MOF                                                        | (0.18, 0.15)    |            |             | 330                 | 360                 |
| Eu <sub>0.23</sub> Tb <sub>0.19</sub> La <sub>0.58</sub> -MOF | (0.56, 0.41)    |            |             | 325                 | 545                 |
| Eu <sub>0.16</sub> Tb <sub>0.23</sub> La <sub>0.61</sub> -MOF | (0.49, 0.45)    |            |             | 325                 | 545                 |
| Eu <sub>0.03</sub> Tb <sub>0.03</sub> La <sub>0.94</sub> -MOF | (0.45, 0.47)    |            |             | 320                 | 546                 |
| Eu <sub>0.03</sub> Tb <sub>0.03</sub> La <sub>0.94</sub> -MOF | (0.39, 0.43)    |            |             | 340                 | 543                 |
| Eu <sub>0.03</sub> Tb <sub>0.03</sub> La <sub>0.94</sub> -MOF | (0.36, 0.40)    |            |             | 360                 | 544                 |
| Eu <sub>0.03</sub> Tb <sub>0.03</sub> La <sub>0.94</sub> -MOF | (0.35, 0.38)    |            |             | 364                 | 545                 |
| Eu <sub>0.03</sub> Tb <sub>0.03</sub> La <sub>0.94</sub> -MOF | (0.34, 0.37)    |            |             | 368                 | 543                 |
| Eu <sub>0.03</sub> Tb <sub>0.03</sub> La <sub>0.94</sub> -MOF | (0.33, 0.36)    |            |             | 372                 | 543                 |
| Eu <sub>0.03</sub> Tb <sub>0.03</sub> La <sub>0.94</sub> -MOF | (0.31, 0.32)    | 5          |             | 380                 | 543                 |

Table S5. The parameters of porous structure of Eu-MOF.

| Specific surface area, m <sup>2</sup> ·g <sup>-1</sup> |       |      | V <sub>pore</sub> , cm <sup>3</sup> ·g <sup>-1</sup> |       | V <sub>ads</sub> (N <sub>2</sub> ) <sup>a</sup> ,<br>cm <sup>3</sup> (STP)·g <sup>-1</sup> |
|--------------------------------------------------------|-------|------|------------------------------------------------------|-------|--------------------------------------------------------------------------------------------|
| Langmuir                                               | BET   | DFT  | Total <sup>a</sup>                                   | DFT   |                                                                                            |
| —                                                      | 142.7 | 84.5 | 0.098                                                | 0.093 | 62.5                                                                                       |

<sup>a</sup> measured at  $P/P_0 = 0.95$ .Table S6. Selectivity factors for separation of equimolar binary CO<sub>2</sub>/C<sub>2</sub>H<sub>2</sub> mixture.

| Calculation method    | 273 K | 298 K |
|-----------------------|-------|-------|
| Amount adsorbed ratio | 1.3   | 1.1   |
| Henry constants ratio | 1.5   | 1.3   |
| IAST                  | 1.3   | 1.1   |



Table S7. Comparison of CO<sub>2</sub> and C<sub>2</sub>H<sub>2</sub> uptakes and adsorption selectivity factors for the representative CO<sub>2</sub>/C<sub>2</sub>H<sub>2</sub> selective MOFs at 1 bar.

| Material <sup>a</sup>                                                                                                                            | T, K       | CO <sub>2</sub> uptake,<br>mL(STP)·g <sup>-1</sup> | C <sub>2</sub> H <sub>2</sub> uptake,<br>mL(STP)·g <sup>-1</sup> | Selectivity                          |                                | Ref.             |
|--------------------------------------------------------------------------------------------------------------------------------------------------|------------|----------------------------------------------------|------------------------------------------------------------------|--------------------------------------|--------------------------------|------------------|
|                                                                                                                                                  |            |                                                    |                                                                  | IAST                                 | V <sub>1</sub> /V <sub>2</sub> |                  |
| [Cu(PF <sub>6</sub> ) <sub>2</sub> (bpetha) <sub>2</sub> ]                                                                                       | 195        | 135                                                | 78                                                               | n/a                                  | 1.73                           | 1                |
| [Zn <sub>2</sub> (bdc) <sub>2</sub> (dabco)]⊃DSB                                                                                                 | 195        | 140                                                | 73                                                               | n/a                                  | 1.92                           | 2                |
| K <sub>2</sub> [Cr <sub>3</sub> O(O <sub>2</sub> CH) <sub>6</sub> (4-Etpy) <sub>3</sub> ] <sub>2</sub><br>[α-SiW <sub>12</sub> O <sub>40</sub> ] | 278        | 12                                                 | 2.5                                                              | n/a                                  | 4.8                            | 3                |
| [Co(HL <sup>dc</sup> )]                                                                                                                          | 195        | 239.5                                              | 140                                                              | 1.7                                  | 1.7                            | 4                |
| [Mn(bdc)(dpe)]                                                                                                                                   | 273        | 15.7 <sup>b</sup> / 47.1                           | 2.2 <sup>b</sup> / 6.7                                           | 13 <sup>c</sup> / 8.8                | 7.0                            | 5                |
| SIFSIX-3-Ni                                                                                                                                      | 298        | 56.0 <sup>c</sup> / 60.5                           | 47.1 <sup>c</sup> / 74.0                                         | 14.3 <sup>c</sup> / 7.7 <sup>d</sup> | 0.82                           | 6                |
| NbOFFIVE-1-Ni                                                                                                                                    | 298        | 3 / 49.3                                           | 13 <sup>b</sup> / 53.8                                           | n/a                                  | 0.9                            | 7                |
| CD-MOF-1                                                                                                                                         | 298        | 12.3 <sup>e</sup> / 64.3                           | 3.4 <sup>e</sup> / 50.0                                          | 6.6 <sup>d</sup>                     | 1.3                            | 8                |
| CD-MOF-2                                                                                                                                         | 298        | 24.6 <sup>e</sup> / 59.4                           | 0.7 <sup>e</sup> / 45.5                                          | 16.0 <sup>d</sup>                    | 1.3                            |                  |
| [Tm <sub>2</sub> (OH-bdc) <sub>2</sub> (μ <sub>3</sub> -OH) <sub>2</sub> (H <sub>2</sub> O) <sub>2</sub> ]                                       | 298        | 4.3 <sup>e</sup> / 130.7                           | 0.2 <sup>e</sup> / 47.1                                          | 17.5 <sup>d</sup>                    | 2.8                            | 9                |
| [Tm <sub>2</sub> (OH-bdc) <sub>2</sub> (μ <sub>3</sub> -OH) <sub>2</sub> ]                                                                       | 298        | 1.1 <sup>e</sup> / 139.2                           | 0.7 <sup>e</sup> / 117.7                                         | 1.65 <sup>d</sup>                    | 1.2                            |                  |
| Cd[Fe(CN) <sub>5</sub> (NO)]                                                                                                                     | 298        | 58                                                 | 9.7                                                              | 85                                   | 6.0                            | 10               |
| MUF-16(Co)                                                                                                                                       | 293        | 48                                                 | 4.0                                                              | 510                                  | 12                             |                  |
| MUF-16(Mn)                                                                                                                                       | 293        | 50.5                                               | 9.7                                                              | 31                                   | 5.2                            | 11               |
| MUF-16(Ni)                                                                                                                                       | 293        | 48                                                 | 7.5                                                              | 46                                   | 6.4                            |                  |
| [Sc(Hpzc)(pzc)]                                                                                                                                  | 273        | 48.9                                               | 14.9                                                             | 2.1                                  | 3.28                           | 12               |
|                                                                                                                                                  | 298        | 11.9                                               | 7.3                                                              | 1.1                                  | 1.63                           |                  |
| [Zn(atz)(bdc-Cl <sub>4</sub> ) <sub>0.5</sub> ]                                                                                                  | 285        | 21                                                 | 10.9                                                             | 2.4                                  | 1.9                            | 13               |
| <b>Eu-MOF</b>                                                                                                                                    | <b>273</b> | <b>32.7</b>                                        | <b>25.6</b>                                                      | <b>1.3</b>                           | <b>1.3</b>                     | <b>This work</b> |
|                                                                                                                                                  | <b>298</b> | <b>23.3</b>                                        | <b>20.7</b>                                                      | <b>1.1</b>                           | <b>1.1</b>                     |                  |

<sup>a</sup> bpetha = 1,2-bis(4-pyridyl)ethane; bdc<sup>2-</sup> = 1,4-benzenedicarboxylate; dabco = 1,4-diazabicyclo[2.2.2]octane; DSB = distyrylbenzene; 4-Etpy = 4-ethylpyridine; dpe = 1,2-di(4-pyridyl)ethylene; OH-bdc<sup>2-</sup> = 2,5-dihydroxyterephthalate; H<sub>2</sub>pzc = 2,5-pyrazinedicarboxylic acid; Hatz = 3-amino-1,2,4-triazole; bdc-Cl<sub>4</sub><sup>2-</sup> = tetrachloroterephthalate;

<sup>b</sup> at 0.1 bar;

<sup>c</sup> IAST selectivity at total pressure 0.15 bar for 1:1 gas mixture;

<sup>d</sup> IAST selectivity at total pressure 1 bar for C<sub>2</sub>H<sub>2</sub>/CO<sub>2</sub> = 1:2 gas mixture;

<sup>e</sup> at 0.2 bar.

#### References

- (1) Noro, S.; Tanaka, D.; Sakamoto, H.; Shimomura, S.; Kitagawa, S.; Takeda, S.; Uemura, K.; Kita, H.; Akutagawa, T.; Nakamura, T. Selective Gas Adsorption in One-Dimensional, Flexible CuII Coordination Polymers with Polar Units. *Chem. Mater.* **2009**, *21* (14), 3346–3355. <https://doi.org/10.1021/cm9012969>.

- (2) Yanai, N.; Kitayama, K.; Hijikata, Y.; Sato, H.; Matsuda, R.; Kubota, Y.; Takata, M.; Mizuno, M.; Uemura, T.; Kitagawa, S. Gas Detection by Structural Variations of Fluorescent Guest Molecules in a Flexible Porous Coordination Polymer. *Nature Mater* **2011**, *10* (10), 787–793. <https://doi.org/10.1038/nmat3104>.
- (3) Eguchi, R.; Uchida, S.; Mizuno, N. Inverse and High CO<sub>2</sub>/C<sub>2</sub>H<sub>2</sub> Sorption Selectivity in Flexible Organic–Inorganic Ionic Crystals. *Angew. Chem. Int. Ed.* **2012**, *51* (7), 1635–1639. <https://doi.org/10.1002/anie.201107906>.
- (4) Yang, W.; Davies, A. J.; Lin, X.; Suyetin, M.; Matsuda, R.; Blake, A. J.; Wilson, C.; Lewis, W.; Parker, J. E.; Tang, C. C.; George, M. W.; Hubberstey, P.; Kitagawa, S.; Sakamoto, H.; Bichoutskaia, E.; Champness, N. R.; Yang, S.; Schröder, M. Selective CO<sub>2</sub> Uptake and Inverse CO<sub>2</sub>/C<sub>2</sub>H<sub>2</sub> Selectivity in a Dynamic Bifunctional Metal–Organic Framework. *Chem. Sci.* **2012**, *3* (10), 2993. <https://doi.org/10.1039/c2sc20443f>.
- (5) Foo, M. L.; Matsuda, R.; Hijikata, Y.; Krishna, R.; Sato, H.; Horike, S.; Hori, A.; Duan, J.; Sato, Y.; Kubota, Y.; Takata, M.; Kitagawa, S. An Adsorbate Discriminatory Gate Effect in a Flexible Porous Coordination Polymer for Selective Adsorption of CO<sub>2</sub> over C<sub>2</sub>H<sub>2</sub>. *J. Am. Chem. Soc.* **2016**, *138* (9), 3022–3030. <https://doi.org/10.1021/jacs.5b10491>.
- (6) Chen, K.-J.; Scott, H. S.; Madden, D. G.; Pham, T.; Kumar, A.; Bajpai, A.; Lusi, M.; Forrest, K. A.; Space, B.; Perry, J. J.; Zaworotko, M. J. Benchmark C<sub>2</sub>H<sub>2</sub>/CO<sub>2</sub> and CO<sub>2</sub>/C<sub>2</sub>H<sub>2</sub> Separation by Two Closely Related Hybrid Ultramicroporous Materials. *Chem* **2016**, *1* (5), 753–765. <https://doi.org/10.1016/j.chempr.2016.10.009>.
- (7) Belmabkhout, Y.; Zhang, Z.; Adil, K.; Bhatt, P. M.; Cadiau, A.; Solovyeva, V.; Xing, H.; Eddaoudi, M. Hydrocarbon Recovery Using Ultra-Microporous Fluorinated MOF Platform with and without Uncoordinated Metal Sites: I-Structure Properties Relationships for C<sub>2</sub>H<sub>2</sub>/C<sub>2</sub>H<sub>4</sub> and CO<sub>2</sub>/C<sub>2</sub>H<sub>2</sub> Separation. *Chemical Engineering Journal* **2019**, *359*, 32–36. <https://doi.org/10.1016/j.cej.2018.11.113>.
- (8) Li, L.; Wang, J.; Zhang, Z.; Yang, Q.; Yang, Y.; Su, B.; Bao, Z.; Ren, Q. Inverse Adsorption Separation of CO<sub>2</sub>/C<sub>2</sub>H<sub>2</sub> Mixture in Cyclodextrin-Based Metal–Organic Frameworks. *ACS Appl. Mater. Interfaces* **2019**, *11* (2), 2543–2550. <https://doi.org/10.1021/acsami.8b19590>.
- (9) Ma, D.; Li, Z.; Zhu, J.; Zhou, Y.; Chen, L.; Mai, X.; Liufu, M.; Wu, Y.; Li, Y. Inverse and Highly Selective Separation of CO<sub>2</sub>/C<sub>2</sub>H<sub>2</sub> on a Thulium–Organic Framework. *J. Mater. Chem. A* **2020**, *8* (24), 11933–11937. <https://doi.org/10.1039/D0TA03151H>.
- (10) Xie, Y.; Cui, H.; Wu, H.; Lin, R.; Zhou, W.; Chen, B. Electrostatically Driven Selective Adsorption of Carbon Dioxide over Acetylene in an Ultramicroporous Material. *Angew. Chem. Int. Ed.* **2021**, *60* (17), 9604–9609. <https://doi.org/10.1002/anie.202100584>.
- (11) Qazvini, O. T.; Babarao, R.; Telfer, S. G. Selective Capture of Carbon Dioxide from Hydrocarbons Using a Metal–Organic Framework. *Nat Commun* **2021**, *12* (1), 197. <https://doi.org/10.1038/s41467-020-20489-2>.
- (12) Barsukova, M. O.; Kovalenko, K. A.; Nizovtsev, A. S.; Sapiyanik, A. A.; Samsonenko, D. G.; Dybtsev, D. N.; Fedin, V. P. Isomeric Scandium–Organic Frameworks with High Hydrolytic Stability and Selective Adsorption of Acetylene. *Inorg. Chem.* **2021**, *60* (5), 2996–3005. <https://doi.org/10.1021/acs.inorgchem.0c03159>.
- (13) Li, X.-Y.; Song, Y.; Zhang, C.-X.; Zhao, C.-X.; He, C. Inverse CO<sub>2</sub>/C<sub>2</sub>H<sub>2</sub> Separation in a Pillared-Layer Framework Featuring a Chlorine-Modified Channel by Quadrupole-Moment Sieving. *Separation and Purification Technology* **2021**, *279*, 119608. <https://doi.org/10.1016/j.seppur.2021.119608>.

### 3. Details of gas adsorption experiments

#### 3.1. Heats of Adsorption

Gas adsorption isotherms at 273 K and 298 K were fitted by virial equation (S1) in order to calculate Henry constants and isosteric heats of adsorption.

$$\ln p = \ln n + \frac{1}{T} \sum_i A_i \cdot n^i + \sum_j B_j \cdot n^j \quad (\text{S1})$$

Virial coefficients are summarized in Table S6, whereas the fit plots are shown in Figure S22.

Table S8. Virial coefficients  $A_i$  and  $B_j$  for gas adsorption isotherms at 273 K and 298 K on Eu-MOF.

| Gas                           | Coefficients                                                                                                                                            |
|-------------------------------|---------------------------------------------------------------------------------------------------------------------------------------------------------|
| CO <sub>2</sub>               | $A_0 = -3777.22 \pm 92.18$ (2.44%)<br>$A_1 = 1675.64 \pm 110.5$ (6.592%)<br>$B_0 = 12.4333 \pm 0.3213$ (2.584%)<br>$B_1 = -5.44992 \pm 0.3923$ (7.198%) |
| C <sub>2</sub> H <sub>2</sub> | $A_0 = -3284.84 \pm 181$ (5.51%)<br>$A_1 = 2451.89 \pm 262.2$ (10.69%)<br>$B_0 = 11.0279 \pm 0.6319$ (5.73%)<br>$B_1 = -8.18871 \pm 0.9274$ (11.33%)    |

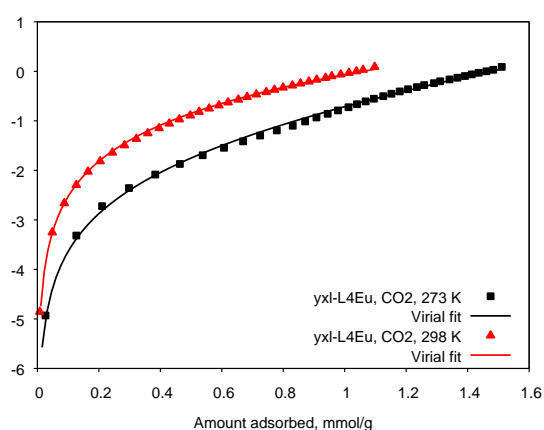

a

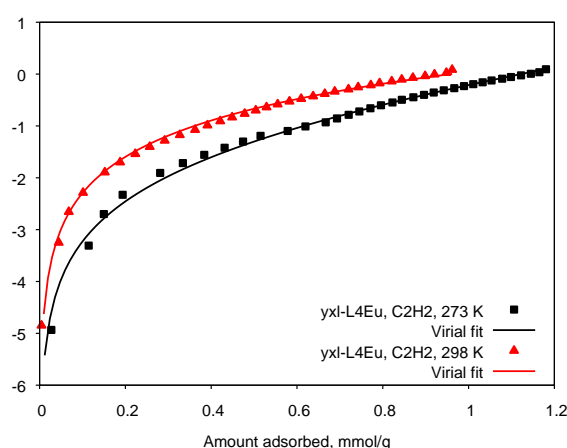

b

Figure S22. Fits of isotherms by virial equations for CO<sub>2</sub> (a) and C<sub>2</sub>H<sub>2</sub> (b).

The isosteric heats of adsorption were calculated using virial coefficients by equation (S2):

$$\Delta H^\circ = R \cdot \sum_i A_i \cdot n^i \quad (\text{S2})$$

The corresponding graphs are shown in Figure S23.

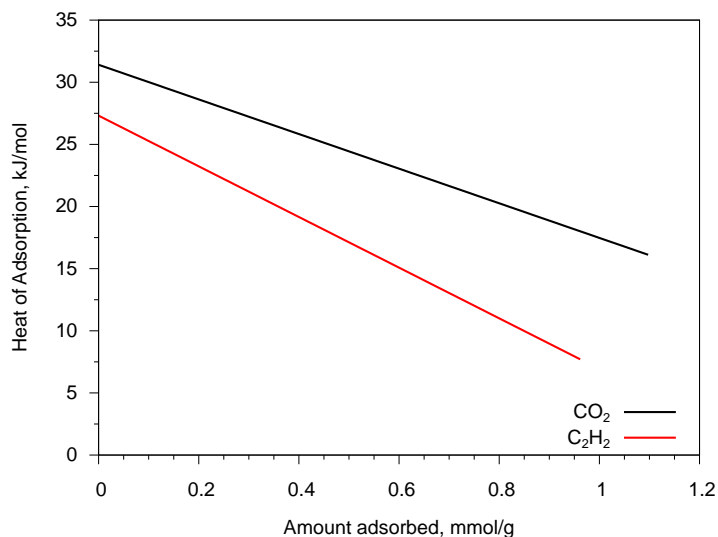

Figure S23. Isosteric heats of CO<sub>2</sub> and C<sub>2</sub>H<sub>2</sub> adsorption on **Eu-MOF**.

### 3.2. Adsorption selectivity

The selectivity factors for separation of binary gas mixture C<sub>2</sub>H<sub>2</sub>/CO<sub>2</sub> were evaluated by three different methods: i) as ratio of amount adsorbed; ii) as ratio of corresponding Henry constants; and iii) by Ideal Adsorbed Solution Theory (IAST) calculations which possess to estimate selectivity factors at different gas mixture compositions and total pressures. The relationship between  $P$ ,  $y_i$  and  $x_i$  ( $P$  — the total pressure of the gas phase,  $y_i$  — mole fraction of the  $i$ -component in gas phase,  $x_i$  — mole fraction of the  $i$ -component in adsorbed state) is defined according to the IAST theory:

$$\int_{p=0}^{p=\frac{Py_1}{x_1}} n_1(p) d \ln p = \int_{p=0}^{p=\frac{Py_2}{x_2}} n_2(p) d \ln p, \quad (\text{S3})$$

where  $n_i(p)$  — amount adsorbed at pressure  $p$ .

In this case the selectivity factors were determined as:

$$S = \frac{y_2 x_2}{y_1 x_1} = \frac{x_1 (1 - y_1)}{y_1 (1 - x_1)} \quad (\text{S4})$$

For IAST calculations adsorption isotherms were fitted by common Langmuir equation. Fittings were performed for isotherms in mL/g–torr units, so parameters are in the corresponding units. Fitted parameters are summarized in Table S7. The fitted isotherms are shown in Figure S24.

Table S9. Fitted parameters for adsorption isotherms on **Eu-MOF** at 273 K and 298 K

| Gas                           | 273 K                                           | 298 K                                             |
|-------------------------------|-------------------------------------------------|---------------------------------------------------|
| C <sub>2</sub> H <sub>2</sub> | $w = 50.4 \pm 0.9$<br>$b = 0.00134 \pm 0.00004$ | $w = 116 \pm 5$<br>$b = 0.000289 \pm 0.000016$    |
| CO <sub>2</sub>               | $w = 52.7 \pm 0.7$<br>$b = 0.00210 \pm 0.00005$ | $w = 97.2 \pm 1.5$<br>$b = 0.000418 \pm 0.000008$ |

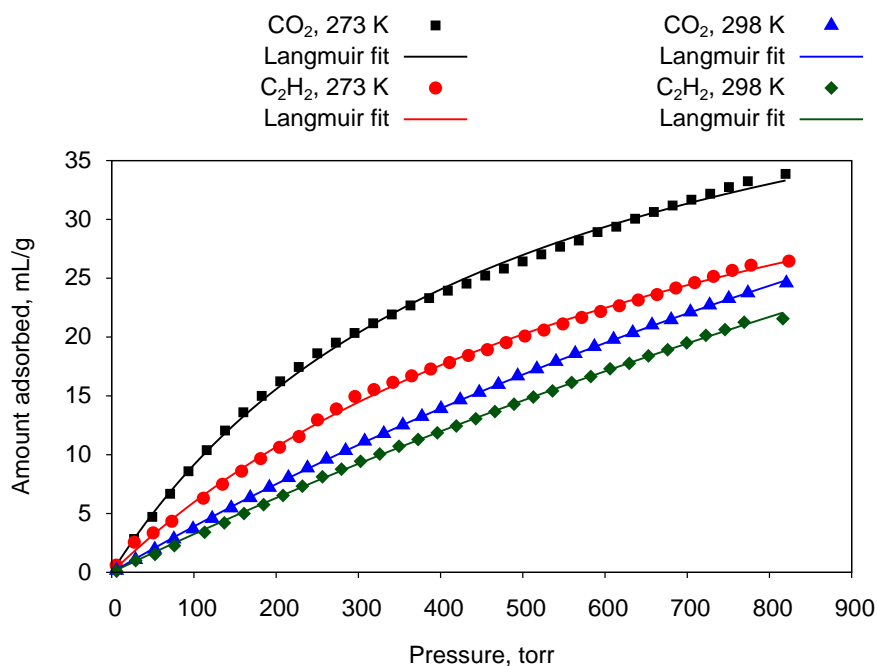

Figure S24. Fits of isotherms by Langmuir equation.

Henry constants (Table S10) were calculated using virial coefficients by equation (S5):

$$K_h = \exp \left[ \frac{-A_0}{T} - B_0 \right] \quad (\text{S5})$$

Table S10. Henry constants for gas adsorption on **Eu-MOF** in  $\text{mmol} \cdot \text{g}^{-1} \cdot \text{bar}^{-1}$  at 273 K and 298 K.

| Gas\Temperature               | 273 K | 298 K |
|-------------------------------|-------|-------|
| C <sub>2</sub> H <sub>2</sub> | 2.730 | 0.995 |
| CO <sub>2</sub>               | 4.066 | 1.274 |
